# Supplementary material
Source: PubMed Central journal article supplement (PMC8424475)
Supplement: jama-e2111559-s004.pdf [file jama-e2111559-s004.pdf]

## Data Sharing Statement

Phipatanakul. Effect of School Integrated Pest Management or Classroom Air Filter Purifiers on Asthma Symptoms in Students With Active Asthma. *JAMA*. Published September 07, 2021.  
doi:10.1001/jama.2021.11559

### Data

**Data available:** Yes

**Data types:** Deidentified participant data

**How to access data:** Requests for de-identified data from this clinical trial should be made to the corresponding author. Following completion of a signed data access agreement for a specified purpose (e.g., a meta-analysis), researchers whose proposed use of the data has been approved will receive de-identified data for study participants and a data dictionary for this clinical trial, starting on December 1 of 2021.

**When available:** beginning date: 12-31-2021

### Supporting Documents

**Document types:** None

### Additional Information

**Who can access the data:** Researchers who proposed use of the data has been approved

**Types of analyses:** for specified purpose

**Mechanisms of data availability:** without investigator support, after approval of a proposal with signed data access agreement
